# Supplementary material for: Enhanced high-order ultraviolet upconversion luminescence in sub-20 nm β-NaYbF4:0.5% Tm nanoparticles via Fe3+doping
Source: Royal Society of Chemistry journal article supplement (doi:10.1039/c6ce02568d), 2017-01-01
Supplement: c6ce02568d1.pdf [file c6ce02568d1.pdf]

## ***Electronic supplementary information (ESI)***

### **Enhanced high-order ultraviolet upconversion luminescence in sub-20 nm $\beta$ -NaYbF<sub>4</sub>:0.5%Tm nanoparticles via Fe<sup>3+</sup> doping**

Yanting Zhang<sup>a</sup>, Yingli Shen<sup>a</sup>, Miao Liu<sup>a</sup>, Yu Han<sup>a</sup>, Xiulan Mo<sup>a</sup>, Ruibin Jiang<sup>a</sup>, Zhibin Lei<sup>a</sup>, Zonghuai Liu<sup>a</sup>, Feng Shi<sup>a\*</sup> and Weiping Qin<sup>b\*</sup>

*<sup>a</sup>Shaanxi Key Laboratory for Advanced Energy Devices, Shaanxi Engineering Lab for Advanced Energy Technology, School of Materials Science and Engineering, Shaanxi Normal University, Xi'an 710119, China.*

*<sup>b</sup>State Key Laboratory on Integrated Optoelectronics, College of Electronic Science and Engineering, Jilin University, Changchun 130012, China.*

#### **Corresponding Authors:**

\*E-mail: shifeng@snnu.edu.cn; wpqin@jlu.edu.cn

**Table S1** Refined lattice constants of as-synthesized  $\beta$ -NaYbF<sub>4</sub>:0.5%Tm,X%Fe UCNPs.

---

| Value   | X = 0 % | X = 2.5 % | X = 5.0 % | X = 10.0% |
|---------|---------|-----------|-----------|-----------|
| a=b (Å) | 5.92945 | 5.92845   | 5.92763   | 5.93015   |
| c (Å)   | 3.46955 | 3.46911   | 3.46845   | 3.47011   |

---

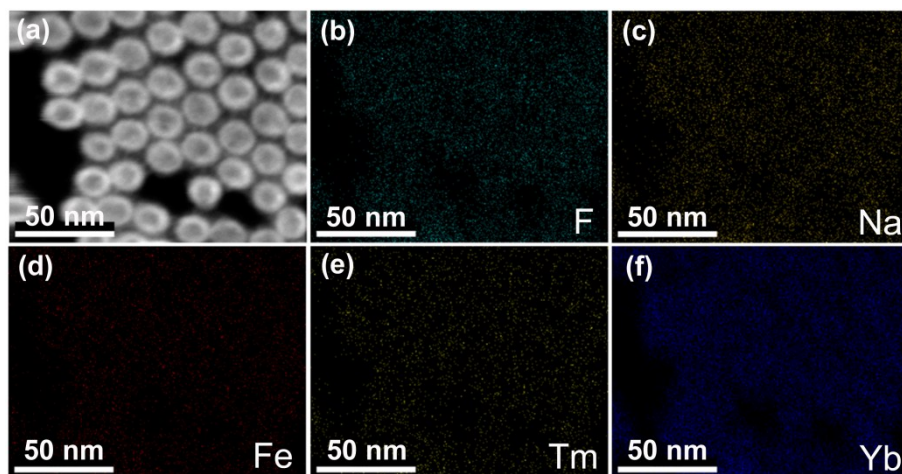

**Fig. S1** (a) STEM image (b-f) EDX elemental mapping of  $\beta$ -NaYbF<sub>4</sub>:0.5%Tm,5%Fe UCNPs and line-profile analysis of  $\beta$ -NaYbF<sub>4</sub>:0.5%Tm,5%Fe with different elements (F, Na, Fe, Tm and Yb).

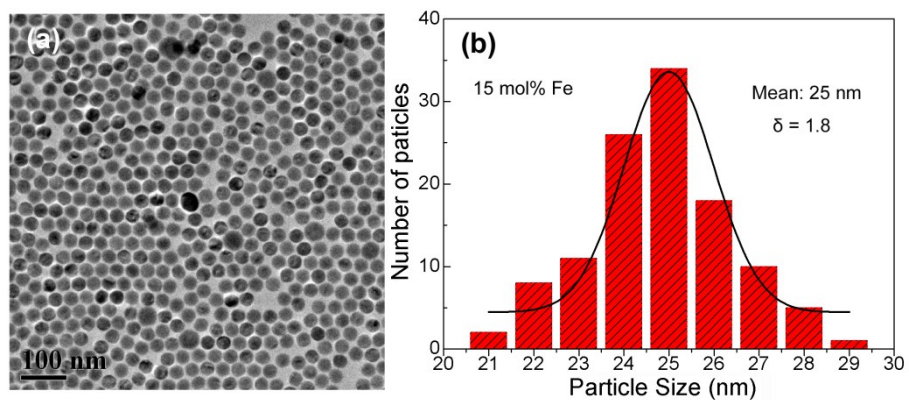

**Fig. S2** (a) TEM characterization of  $\beta$ -NaYbF<sub>4</sub>:0.5%Tm,15%Fe UCNPs and (b) corresponding histograms of size distribution.

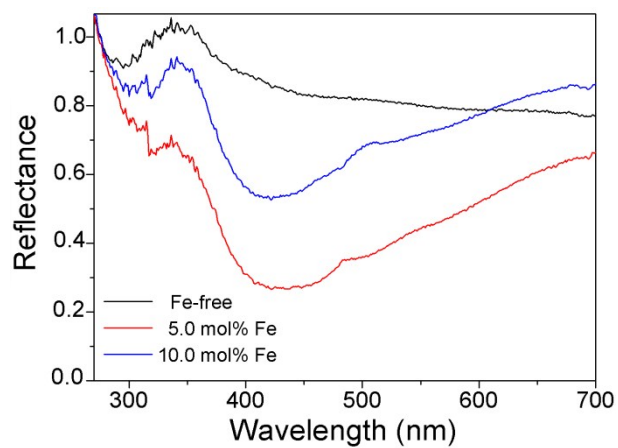

**Fig. S3** Diffuse reflectance spectra for Fe<sup>3+</sup>-free and X mol% Fe<sup>3+</sup> codoped  $\beta$ -NaYbF<sub>4</sub>:0.5%Tm (X = 5.0 and 10.0) NPs.

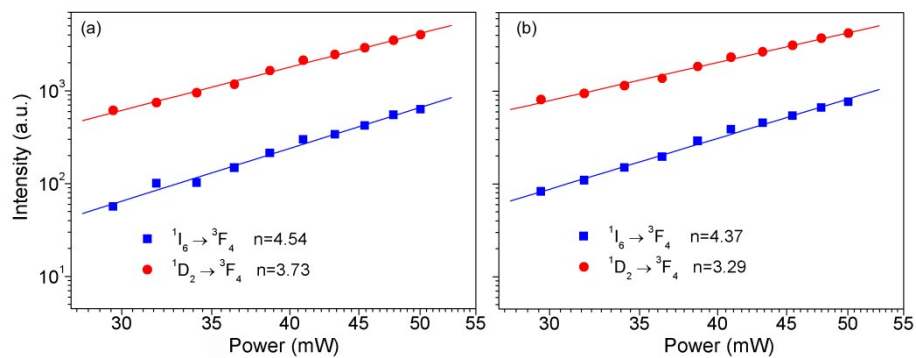

**Fig. S4** Pump power dependence of the UV ( $^1I_6 \rightarrow ^3F_4$ ) and blue ( $^1D_2 \rightarrow ^3F_4$ ) UCL of Fe<sup>3+</sup>-free (a) and 5 mol% Fe<sup>3+</sup> (b) codoped  $\beta$ -NaYbF<sub>4</sub>:0.5%Tm UCNP.
